# Supplementary material for: LRRK2 is a negative regulator of Mycobacterium tuberculosis phagosome maturation in macrophages
Source: PubMed Central journal article supplement (PMC6003659; doi:10.15252/embj.201798694), 2018-05-22

## Expanded View Figures

### Figure EV1. Loss of LRRK2 activity targets Mtb to phagolysosomes and limits Mtb replication.

- A Confirmation of efficient LRRK2 kinase inhibition by GSK2578215A 24 h after infection of BMDM or iPSDM with Mtb. Representative image of whole cell lysate Western blotted for LRRK2 pS935, total LRRK2 and  $\alpha$ -tubulin.
- B, C LDH assay performed at 72 h post-infection as toxicity control for CFU experiments in Fig 1. Data show mean  $\pm$  SD from three technical replicates. LDH assays were routinely performed for CFU and ELISA experiments.
- D CFUs in RAW264.7 cells pre-treated with GSK2578215A (1  $\mu$ M) or DMSO control for 2 h and infected with Mtb-eGFP (MOI = 1). \* $P$  < 0.5, \*\*\* $P$  < 0.001 by Student's  $t$ -test corrected for multiple comparison. Data show mean  $\pm$  SD. One out of two experiments shown.
- E RAW264.7 cells were pre-treated with 1  $\mu$ M GSK2578215A or DMSO (Control) for 2 h, and LAMP-1 recruitment at 24 h post-infection was assessed using confocal microscopy.
- F Quantification of panel (E). Data show mean  $\pm$  SEM from three independent experiments. \*\* $P$  < 0.01 by Student's  $t$ -test.
- G Mtb growth analysed by single cell imaging in WT, LRRK2 KO and LRRK2 G2019S KI BMDM. Data show mean  $\pm$  SEM from three independent experiments. \*\*\* $P$  < 0.001 by Student's  $t$ -test corrected for multiple comparisons.
- H Mtb growth analysed by single cell imaging in WT, LRRK2 G2019S KI BMDM and LRRK2 G2019S KI BMDM treated with GSK2578215A for 2 h. Data show mean  $\pm$  SEM from three independent experiments. \*\* $P$  < 0.001 by Student's  $t$ -test corrected for multiple comparisons.
- I CFU in WT BMDM, WT BMDM treated with GSK2578215A and LRRK2 KO BMDM left untreated or pre-activated with IFN- $\gamma$  (100 U/ml over night). Data show mean  $\pm$  SD from technical replicates. One representative experiment out of three experiments shown. \*\*\* $P$  < 0.001 by Student's  $t$ -test corrected for multiple comparison.

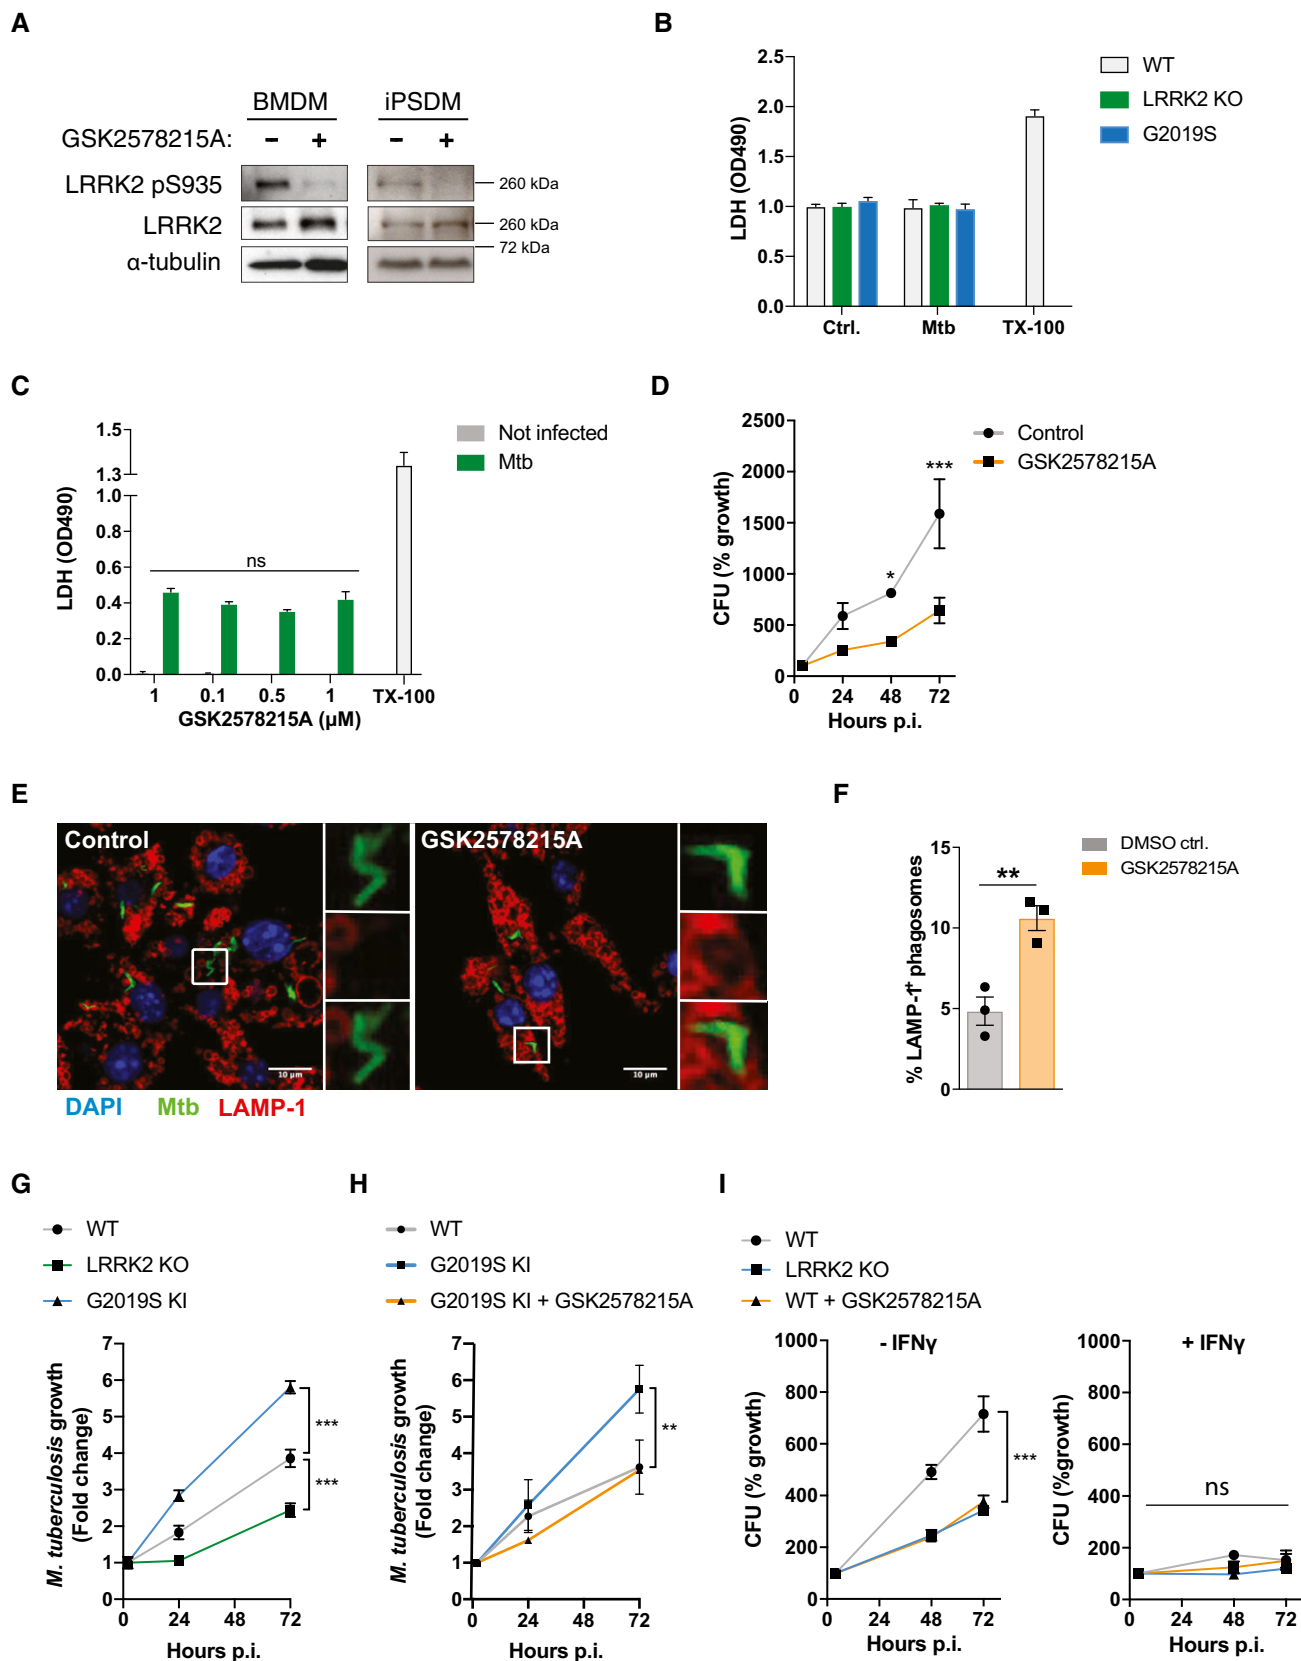

Figure EV1.

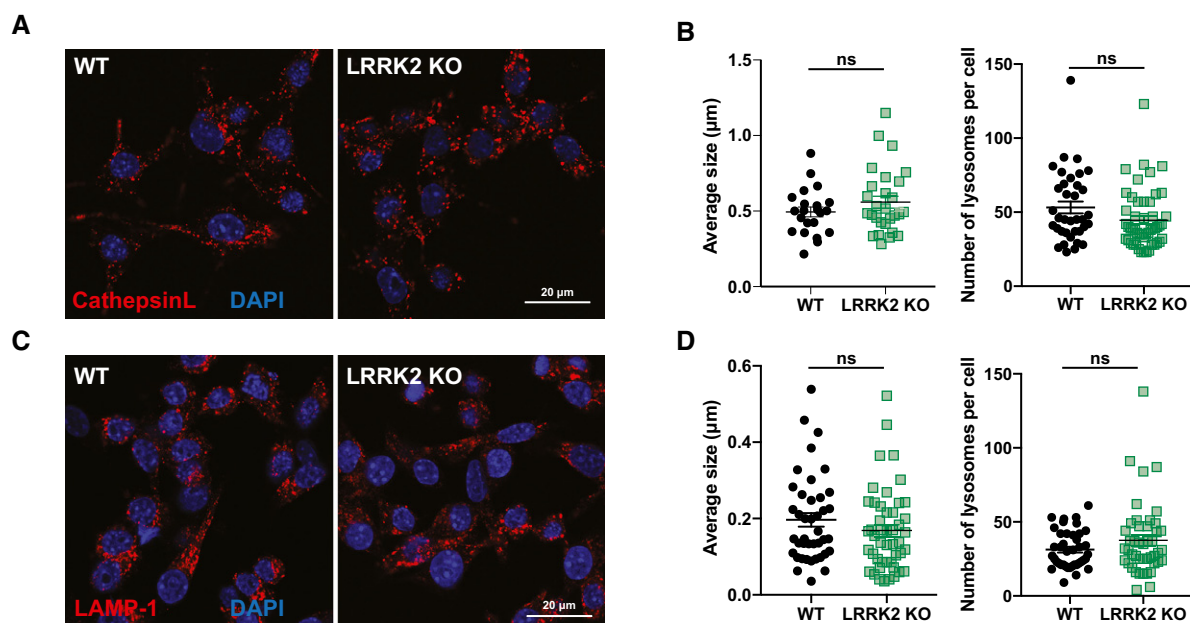

**Figure EV2. LRRK2 KO has no major impact on lysosomal morphology.**

A Representative images of WT and LRRK2 KO BMDM incubated with cathepsin L probe for 30 min.

B Quantification of (A), showing average lysosomal size and numbers. Each dot represents a single cell.

C Representative images of WT and LRRK2 KO BMDMs stained for LAMP-1.

D Quantification of (C), showing average lysosomal size and numbers. Each dot represents a single cell.

Data information: Data show mean  $\pm$  SEM from three independent experiments. ns = not significant by Student's *t*-test.

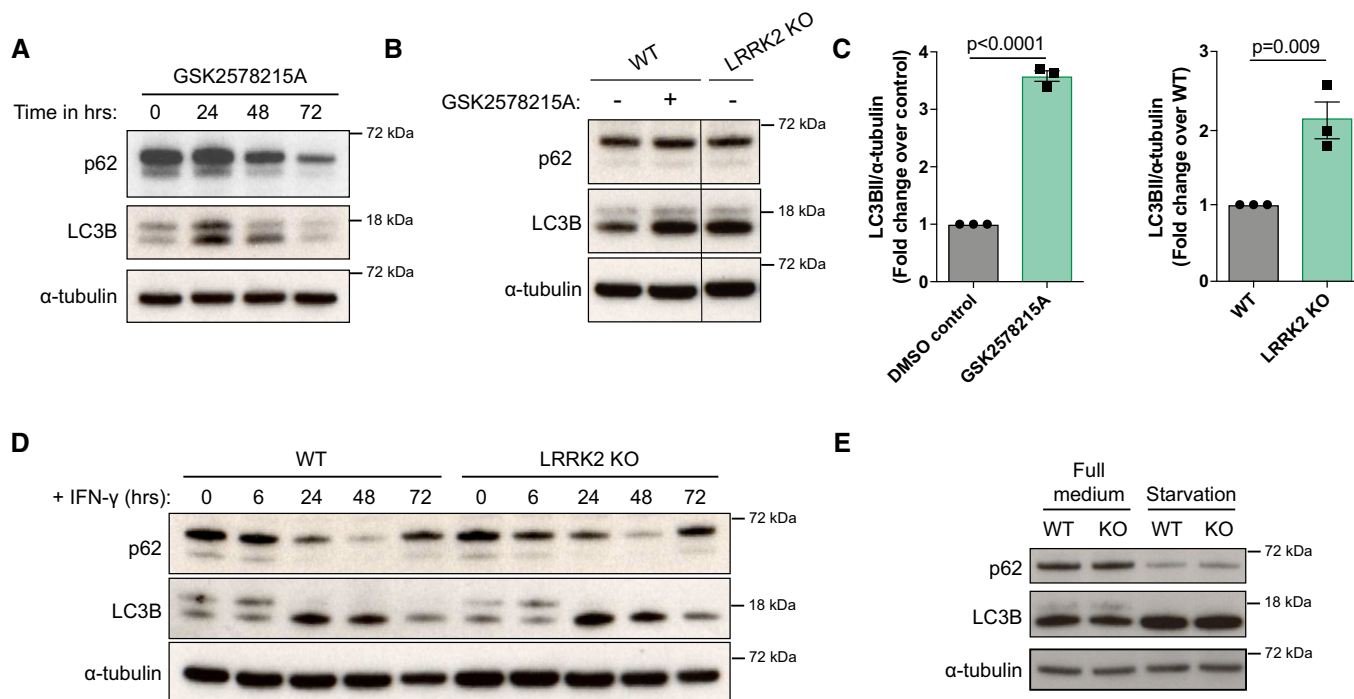

**Figure EV3. Role of LRRK2 in autophagy regulation.**

- A WT BMDMs were treated with 1  $\mu$ M GSK2578215A, and p62 and LC3B levels were monitored by Western blotting over time.  $\alpha$ -tubulin was used as a loading control.
- B WT and LRRK2 KO BMDMs were treated or not with 1  $\mu$ M GSK2578215A and p62 and LC3B levels were monitored by Western blotting at 24 h after treatment.  $\alpha$ -Tubulin was used as a loading control.
- C Quantification of (B). Each dot represents an independent experiment. Data show mean + SEM analysed by Student's *t*-test.
- D WT and LRRK2 KO BMDMs were treated with 100 U/ml IFN- $\gamma$ , and p62 and LC3B levels were monitored by Western blotting over time.  $\alpha$ -Tubulin was used as a loading control.
- E WT and LRRK2 KO BMDMs were left in full medium or starved in HBSS for 4 h, and p62 and LC3B levels were monitored by Western blotting.  $\alpha$ -Tubulin was used as a loading control.

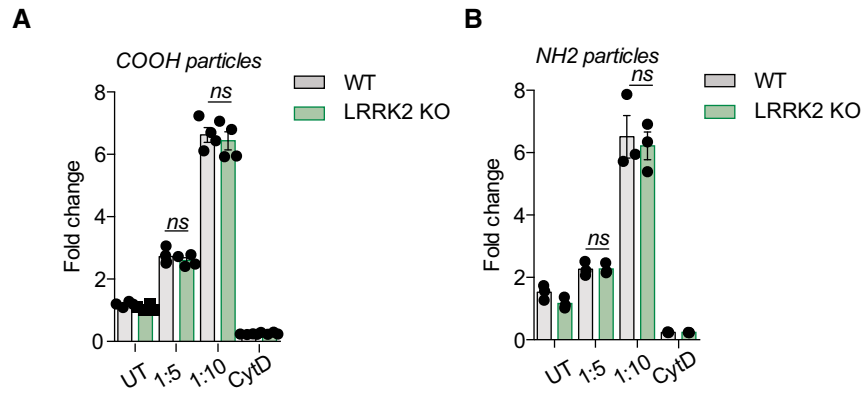

**Figure EV4. Loss of LRRK2 does not regulate phagocytic uptake of COOH and NH<sub>2</sub> beads in macrophages.**

A, B Measurement of the rate of phagocytosis of AF488-coated carboxylated A and amino B beads in WT and LRRK2 KO macrophages. Beads were added to macrophages in 1:300 and 1:1,000 ratio for 30 min, cytochalasin D (1 μM, 1 h pre-treatment) was used as the inhibitor of phagocytosis. Data show mean ± SEM of three biological replicates. ns: non-significant. Student's t-test.

C Gating strategy for phagoFACS and measurement of 2xFYVE-domain-GFP-positive phagosomes. Panel 1 shows beads alone, and panel 2 shows phagosomes containing beads.

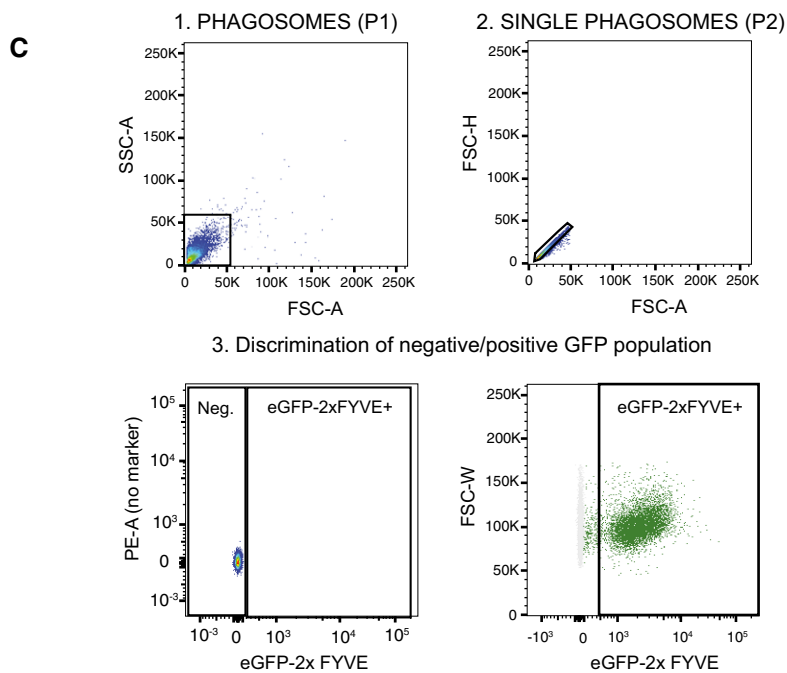

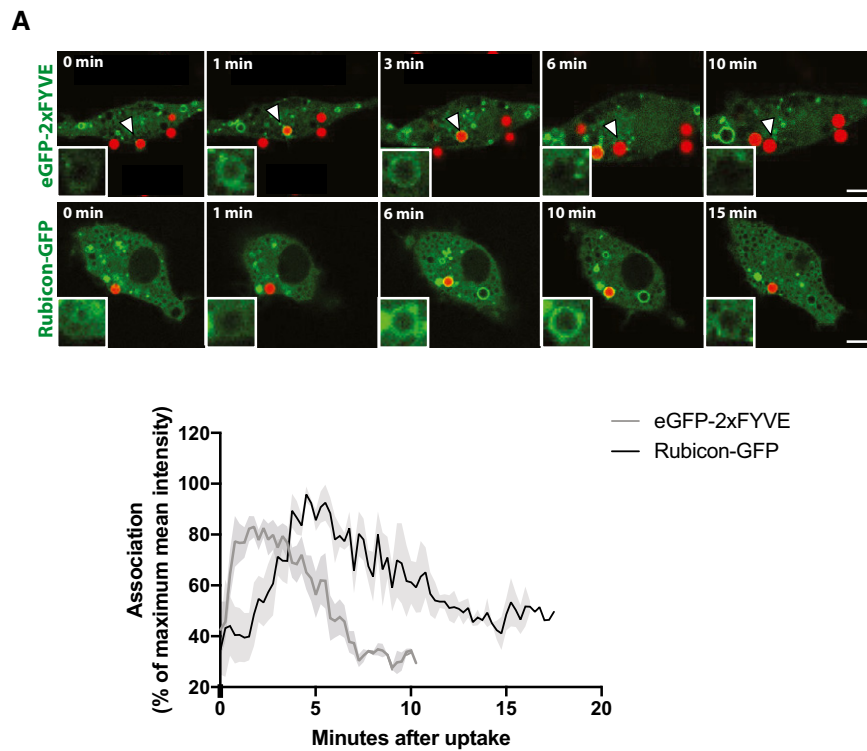

**Figure EV5. Rubicon recruitment follows PI(3)P recruitment to phagosome.**

**A** RAW264.7 macrophages were transfected with either 2xFYVE-domain-GFP or Rubicon-GFP plasmid and incubated with 2  $\mu$ m BSA-coated red-fluorescent carboxylated latex beads. Images were taken every 15 s, and mean fluorescent intensities around the beads were analysed using ImageJ. Graph shows % of maximum mean fluorescence  $\pm$  SEM,  $n = 10$  phagosomes. The arrowhead marks the bead shown in the zoomed panels. Scale bars = 5  $\mu$ m.

**B** Control demonstrating specificity of the anti-Rubicon antibody for Western blotting. Total cell lysates of WT and Rubicon KO BMDMs were blotted for Rubicon and  $\beta$ -tubulin.

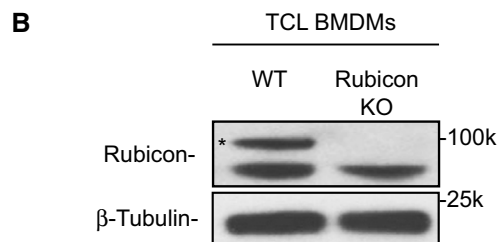

Supplement: EMBJ-37-e98694-s002.pdf [file EMBJ-37-e98694-s002.pdf]
